# Supplementary material for: Pyridinum-based flexible tripodal cleft: a case of fluorescence sensing of ATP and dihydrogenphosphate under different conditions and cell imaging
Source: Royal Society of Chemistry journal article supplement (doi:10.1039/c5ra04023j), 2015-01-01

## Pyridinium-based flexible tripodal cleft: A case of fluorescence sensing of ATP and dihydrogenphosphate under different conditions and cell imaging

Kumares Ghosh<sup>\*a</sup>, Debojyoti Tarafdar<sup>a</sup>, Asmita Samadder<sup>b</sup> and Anisur Rahman Khuda- Bukhsh<sup>b</sup>

<sup>a</sup>Department of Chemistry, University of Kalyani, Kalyani-741235, India. Email: ghosh\_k2003@yahoo.co.in, Fax: +913325828282; Tel: +913325828750, Extn: 306; <sup>b</sup>Department of Zoology, University of Kalyani, Kalyani-741235, India.

### 1. Change in emission of receptor 1 with various anions of sodium salt in CH<sub>3</sub>CN-H<sub>2</sub>O (1:1/v/v, using 10 mM HEPES, pH-6.5).

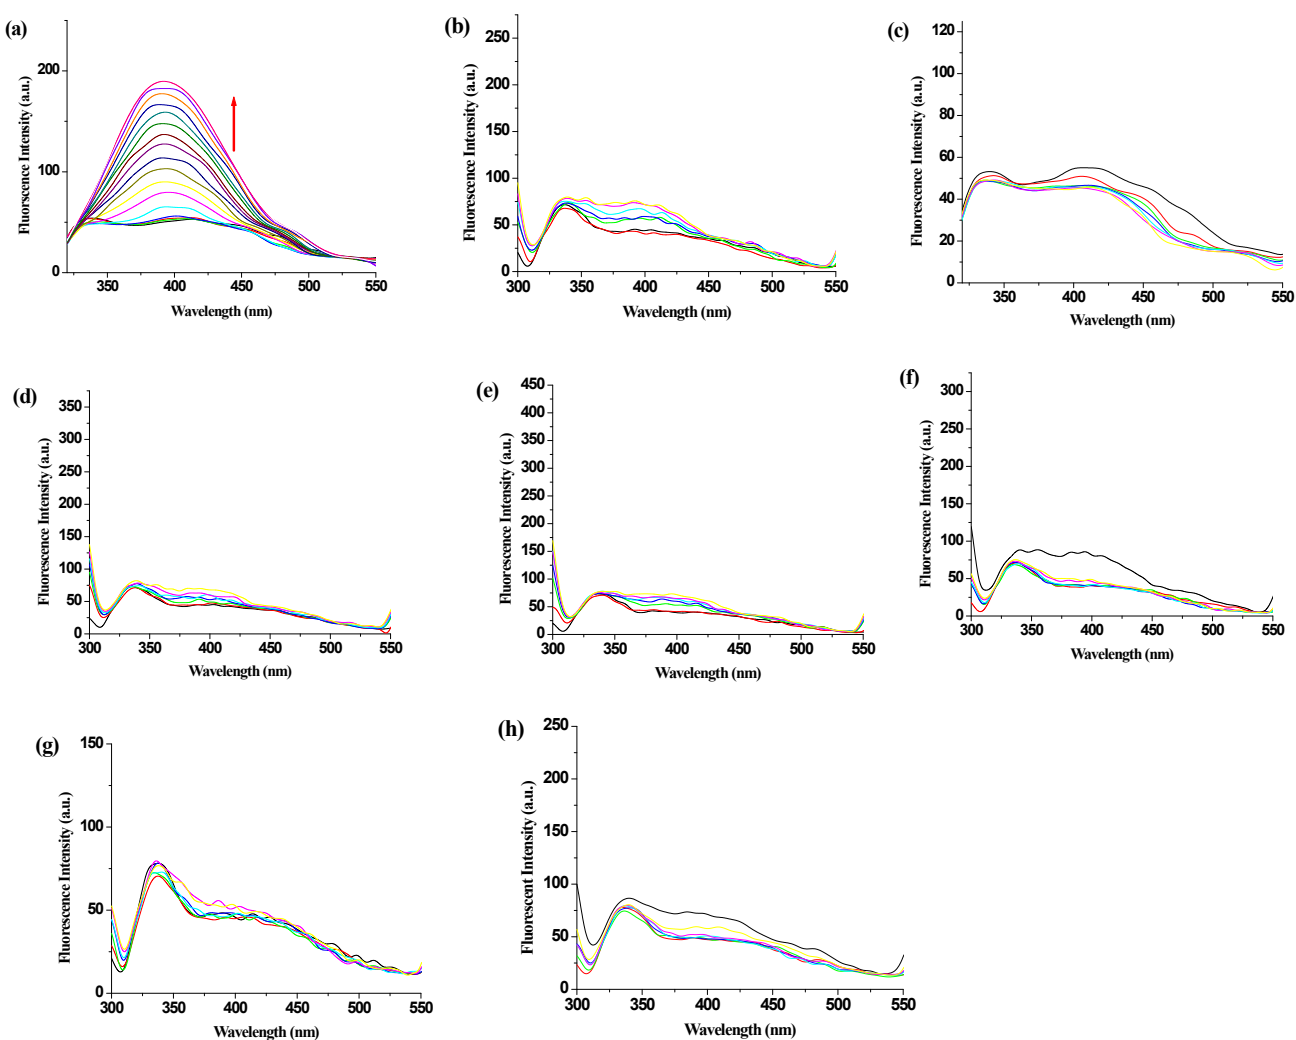

**Figure 1S.** Change in emission of **1** ( $c = 2.5 \times 10^{-5}$  M) in CH<sub>3</sub>CN-H<sub>2</sub>O (1:1/v/v, using 10 mM HEPES, pH = 6.5) upon addition of 30 equiv. amounts of (a) ADP, (b) Na<sub>2</sub>HPO<sub>4</sub>, (c) AMP, (d) Na<sub>3</sub>PO<sub>4</sub>, (e) NaH<sub>2</sub>PO<sub>4</sub>, (f) Na<sub>4</sub>P<sub>2</sub>O<sub>7</sub>, (g) glucose-1-phosphate (G1P), (h) glucose-6-phosphate (G6P) [concentration of anions of sodium salts were  $1 \times 10^{-3}$  M].

## 2. Interference Study in the binding of ATP

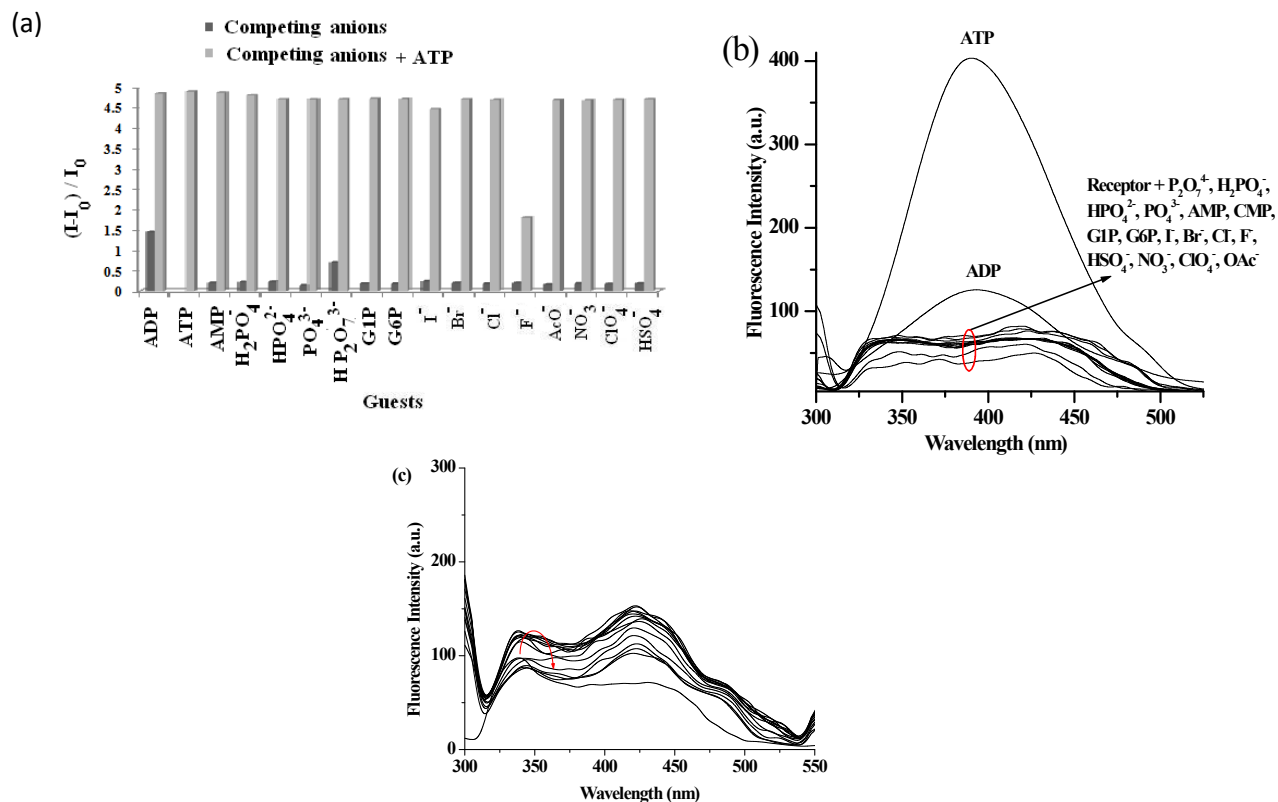

**Figure 2S.** (a) Change in fluorescence ratio of **1** ( $c = 2.5 \times 10^{-5}$  M) in absence and presence of 20 equiv. amounts of ATP in presence of sodium salts of various anions in  $CH_3CN-H_2O$  (1: 1, v/v, pH = 6.5, 10 mM HEPES buffer); (b) change in fluorescence intensity of **1** in  $CH_3CN-H_2O$  (1: 1, v/v, pH = 6.5, 10 mM HEPES buffer) upon addition of 20 equiv. amounts of ATP in presence of other anions; (c) Fluorescence titration spectra of **1** ( $c = 2.5 \times 10^{-5}$  M) with tetrabutylammonium fluoride ( $c = 1.0 \times 10^{-3}$  M).

## 3. Benesi-Hilderband plot for receptor 1 with ADP.

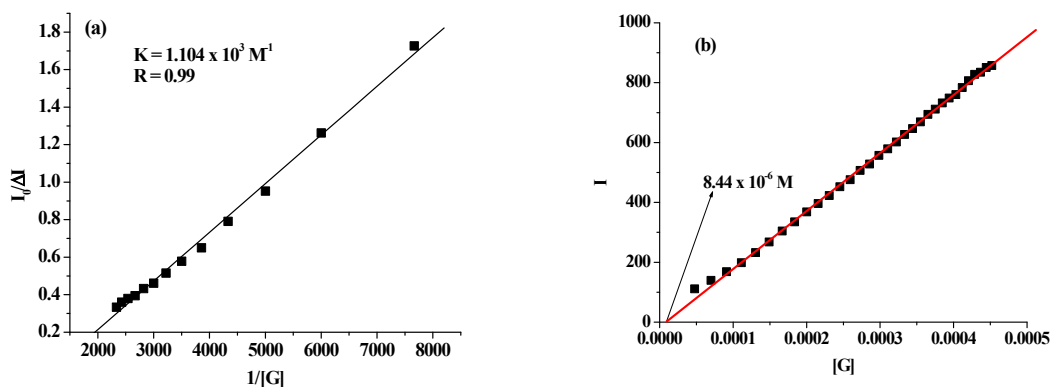

**Figure 3S.** (a) Benesi-Hilderband plot for receptor **1** ( $c = 2.5 \times 10^{-5}$  M) with ADP ( $[ADP] = 1 \times 10^{-3}$  M) at 390 nm; (b) Detection limit for ATP in  $CH_3CN-H_2O$  (1:1/v/v, using 10 mM HEPES, pH = 6.5).

**4. Change in absorbance of receptor 1 with various anions of sodium salt in CH<sub>3</sub>CN-H<sub>2</sub>O (1:1/v/v, using 10 mM HEPES, pH = 6.5).**

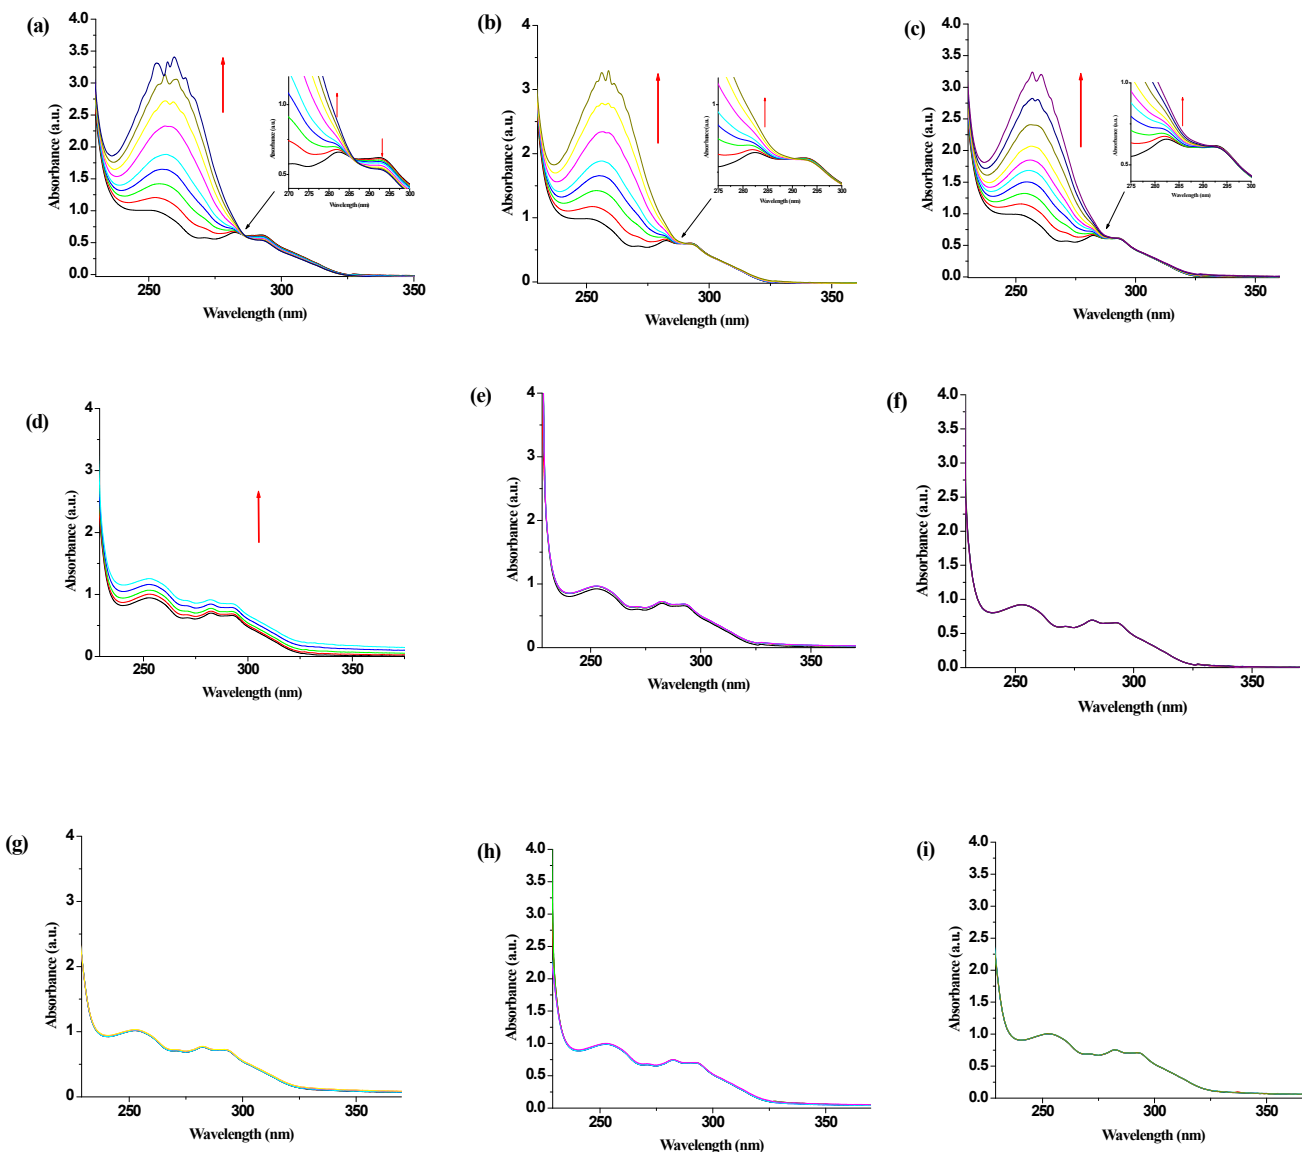

**Figure 4S.** Change in absorbance of **1** ( $c = 2.5 \times 10^{-5}$  M) in CH<sub>3</sub>CN-H<sub>2</sub>O (1:1/v/v, using 10 mM HEPES, pH-6.5) upon addition of 10 equiv. amounts of (a) ATP, (b) ADP, (c) AMP, (d) NaH<sub>2</sub>PO<sub>4</sub>, (e) Na<sub>2</sub>HPO<sub>4</sub>, (f) Na<sub>3</sub>PO<sub>4</sub>, (g) Na<sub>4</sub>P<sub>2</sub>O<sub>7</sub>, (h) G1P, (i) G6P [concentration of anions of sodium salts were  $1 \times 10^{-3}$  M].

## 5. Change in emission of receptor 1 with various anions of tetrabutylammonium salts in CH<sub>3</sub>CN.

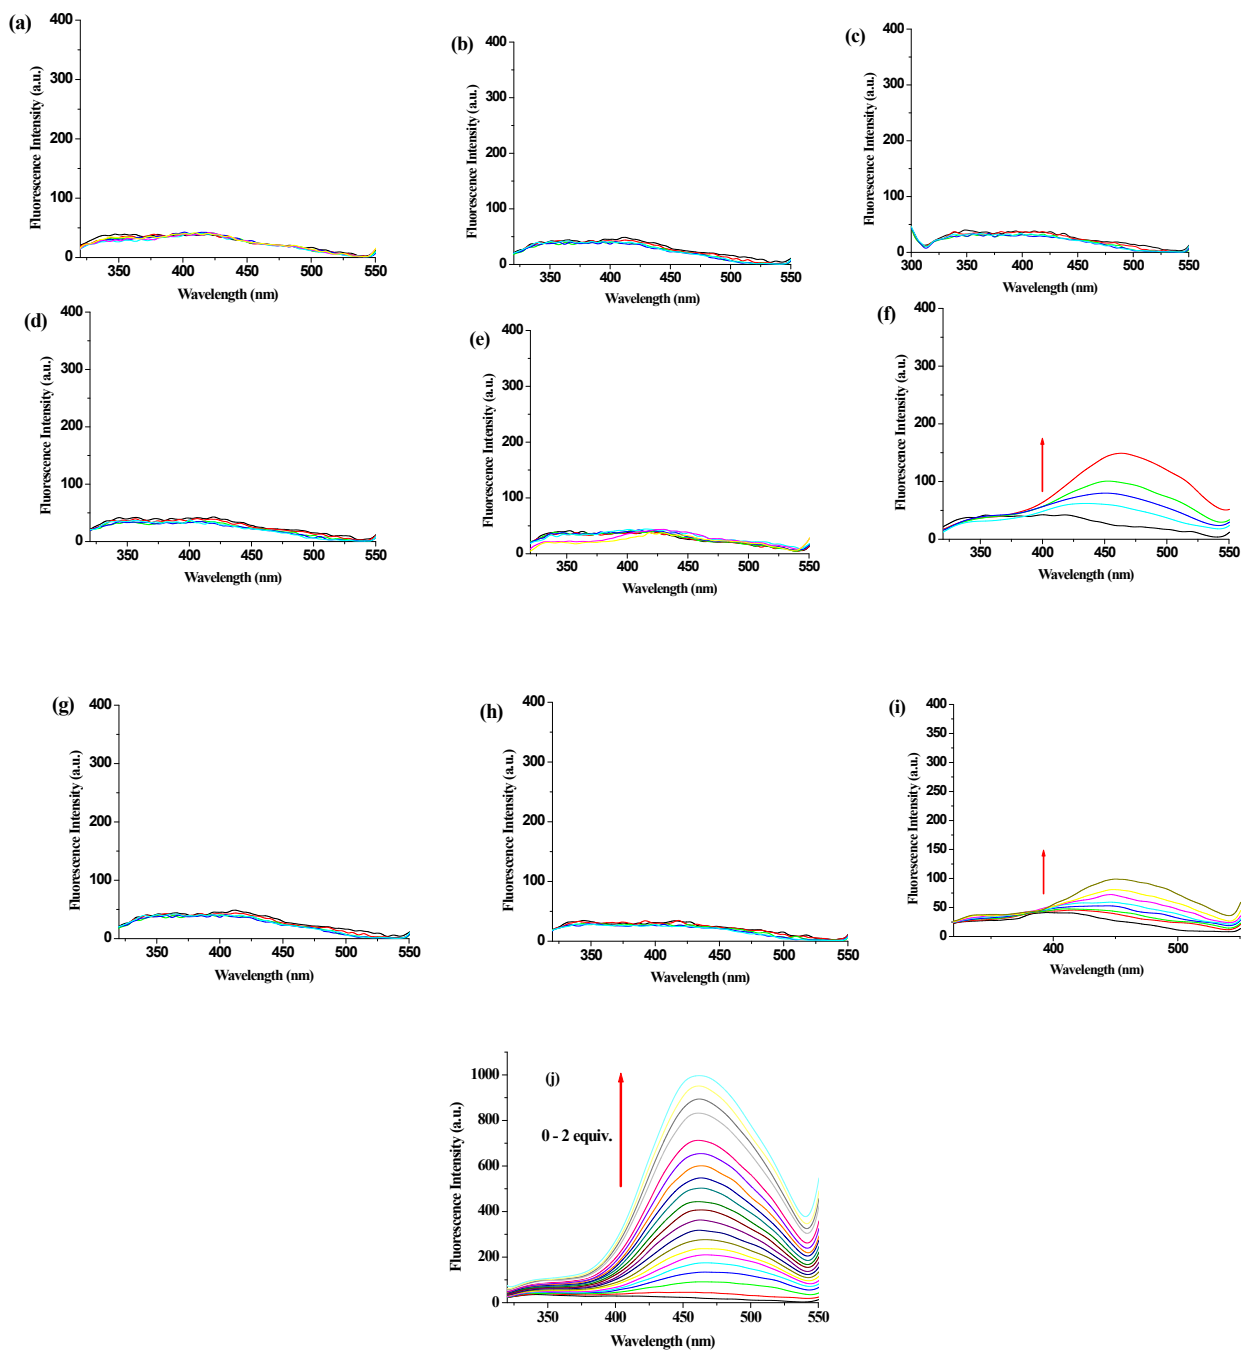

**Figure 5S.** Change in emission of **1** ( $c = 2.2 \times 10^{-5}$  M) in CH<sub>3</sub>CN upon addition of 2 equiv. amounts of (a) OAc<sup>-</sup>, (b) Cl<sup>-</sup> (c) Br<sup>-</sup>, (d) I<sup>-</sup>, (e) F<sup>-</sup>, (f) HP<sub>2</sub>O<sub>7</sub><sup>3-</sup>, (g) NO<sub>3</sub><sup>-</sup>, (h) ClO<sub>4</sub><sup>-</sup>, (i) HSO<sub>4</sub><sup>-</sup> and (j) H<sub>2</sub>PO<sub>4</sub><sup>-</sup> [anions were taken as their tetrabutylammonium salts and their concentrations were  $8 \times 10^{-4}$  M].

## 6. Interference study towards binding of $\text{H}_2\text{PO}_4^-$ ion in $\text{CH}_3\text{CN}$

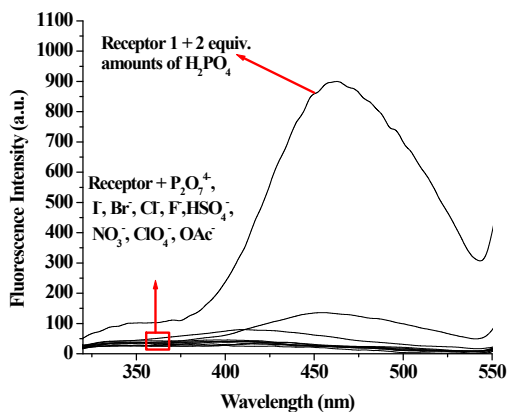

**Figure 6S.** Change in emission of **1** ( $c = 2.2 \times 10^{-5}$  M) upon addition of 2 equiv. amounts of tetrabutylammonium dihydrogenphosphate (TBADHP) ( $c = 8 \times 10^{-4}$  M) in presence of 2 equiv. amounts of other anions as their tetrabutylammonium salts.

## 7. Change in absorbance of receptor 1 with various anions of tetrabutylammonium salts in $\text{CH}_3\text{CN}$ .

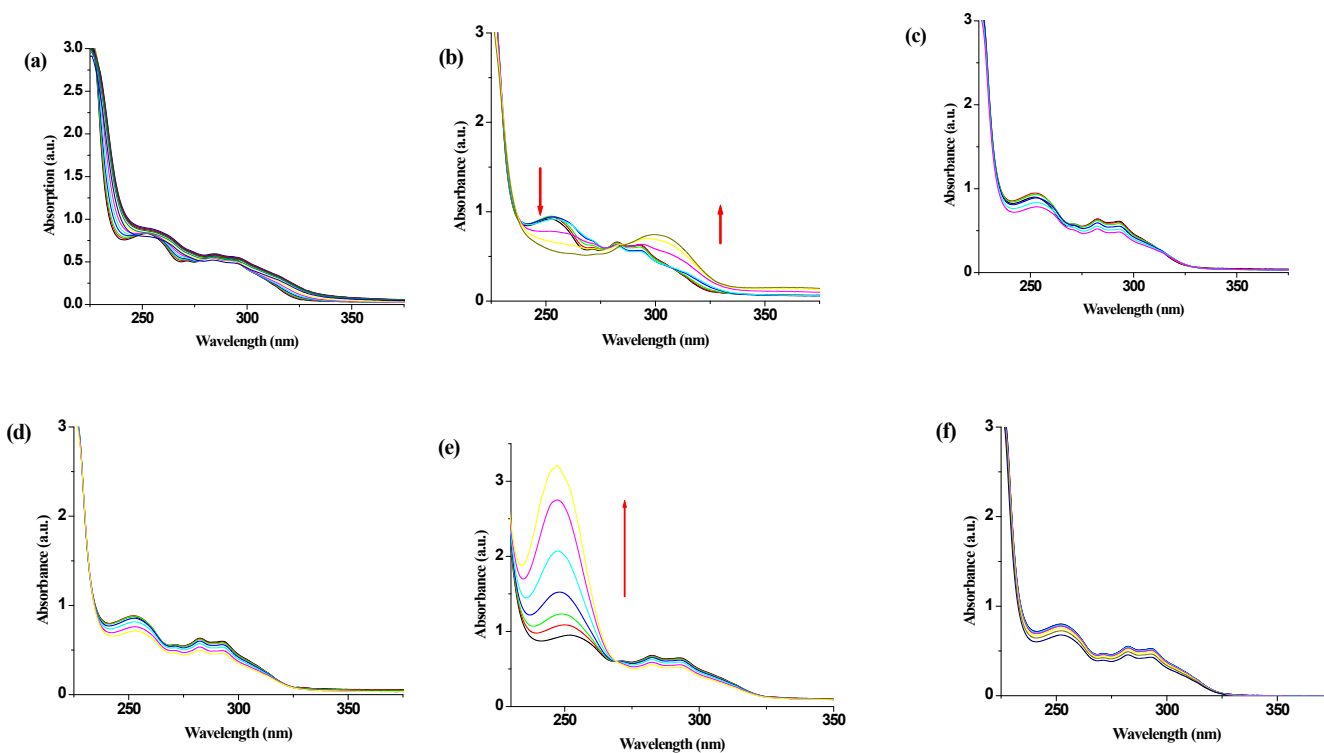

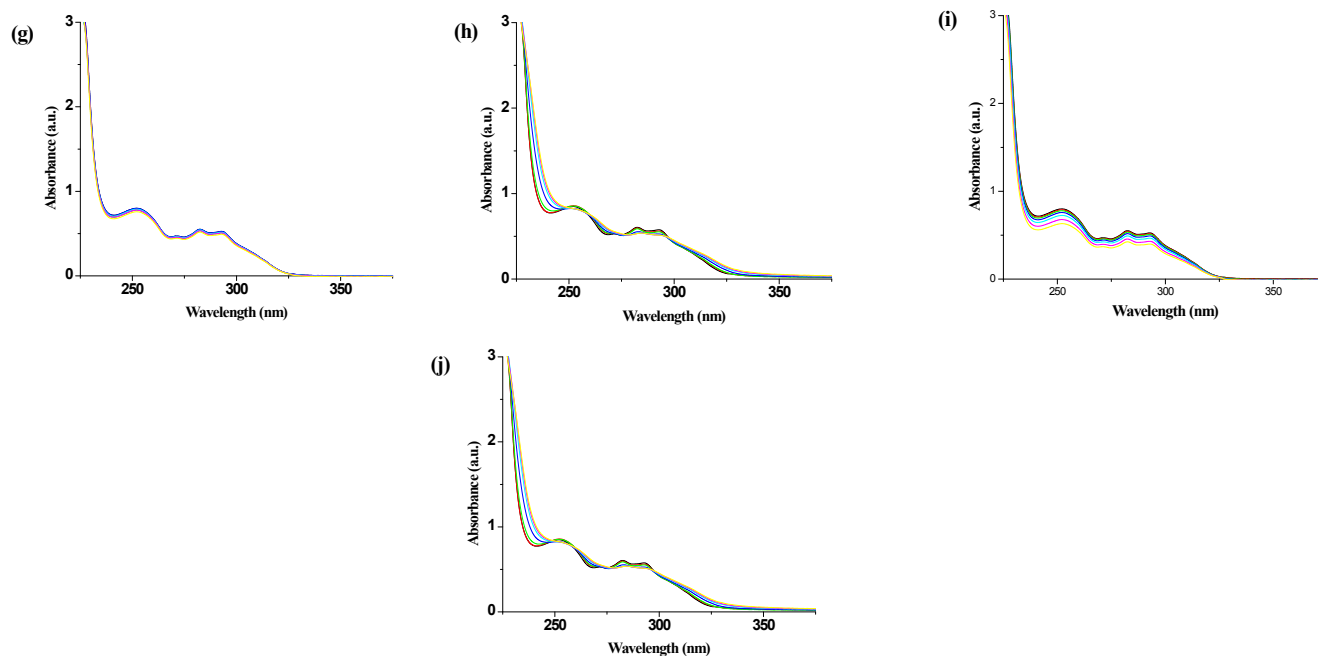

**Figure 7S.** Change in absorbance of **1** ( $c = 2.2 \times 10^{-5}$  M) in  $\text{CH}_3\text{CN}$  upon addition of 10 equiv. amounts of (a)  $\text{H}_2\text{PO}_4^-$ , (b)  $\text{F}^-$ , (c)  $\text{Cl}^-$ , (d)  $\text{Br}^-$ , (e)  $\text{I}^-$ , (f)  $\text{OAc}^-$ , (g)  $\text{HP}_2\text{O}_7^{3-}$ , (h)  $\text{NO}_3^-$ , (i)  $\text{ClO}_4^-$ , (j)  $\text{HSO}_4^-$  [anions were taken as their tetrabutylammonium salts and their concentrations were  $8 \times 10^{-4}$  M].

### 8. Fluorescence Job plot of receptor **1** with $\text{H}_2\text{PO}_4^-$ in $\text{CH}_3\text{CN}$ .

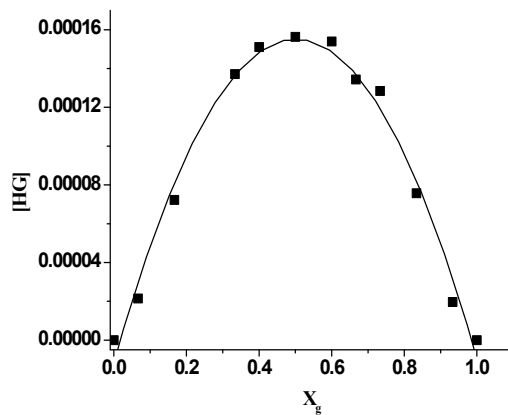

**Figure 8S.** Fluorescence Job's plot for receptor **1** with  $\text{H}_2\text{PO}_4^-$  in  $\text{CH}_3\text{CN}$  measured at 455 nm ( $[\text{H}] = [\text{G}] = 2.5 \times 10^{-5}$  M).

## 9. Benesi-Hilderband plot for receptor 1 with $\text{H}_2\text{PO}_4^-$ .

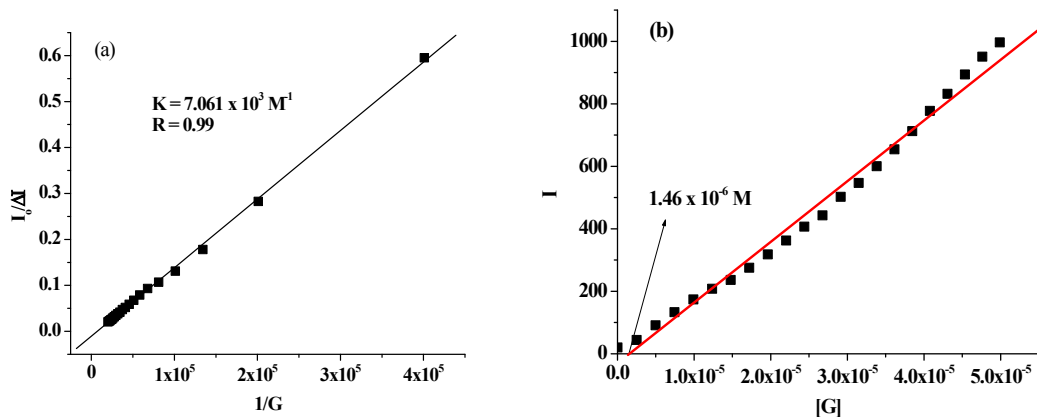

**Figure 9S.** (a) Binding constant curve for receptor 1 ( $c = 2.2 \times 10^{-5} \text{ M}$ ) with  $\text{H}_2\text{PO}_4^-$  ( $c = 8 \times 10^{-4} \text{ M}$ ); (b) Detection limit for  $\text{H}_2\text{PO}_4^-$  in  $\text{CH}_3\text{CN}$ .

## 10. NOESY spectrum

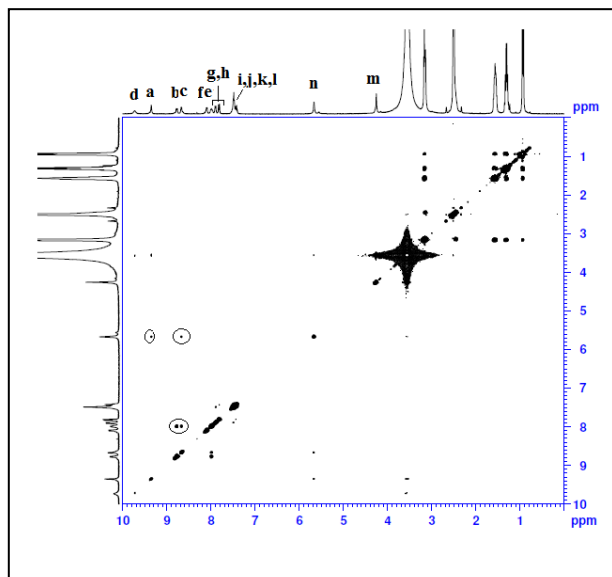

**Figure 10S.** NOESY spectrum of  $1.\text{H}_2\text{PO}_4^-$  ( $d_6\text{-DMSO}/D_2\text{O}$ , 400 MHz) ( $c = 1.83 \times 10^{-3} \text{ M}$ ).

## 11. Change in $^1\text{H}$ NMR of **1** in presence of $\text{H}_2\text{PO}_4^-$ .

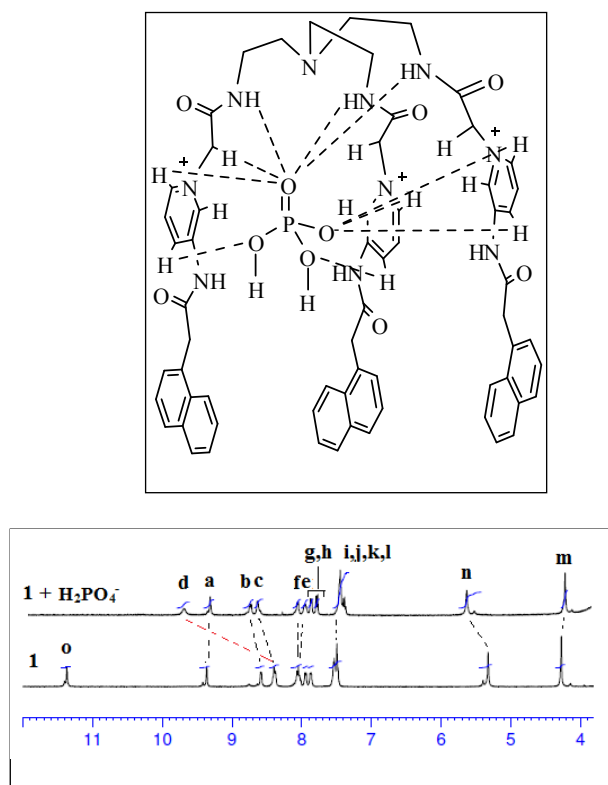

**Figure 11S.** Partial  $^1\text{H}$  NMR ( $d_6$ -DMSO, 400 MHz) of **1** ( $c = 1.83 \times 10^{-3}$  M) with equiv. amount of TBADHP. The mode of interaction is shown above. Dash lines indicate the possible weak H-bond interactions or short contacts in the core in a symmetric fashion.

## 12. MTT assay for receptor **1**.

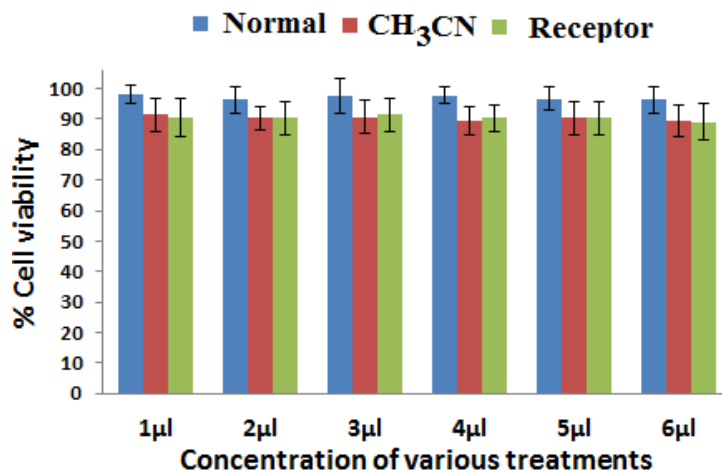

**Figure 12S.** MTT assay of receptor **1**.



**<sup>1</sup>H NMR of 1 (400 MHz, d<sub>6</sub>-DMSO):**

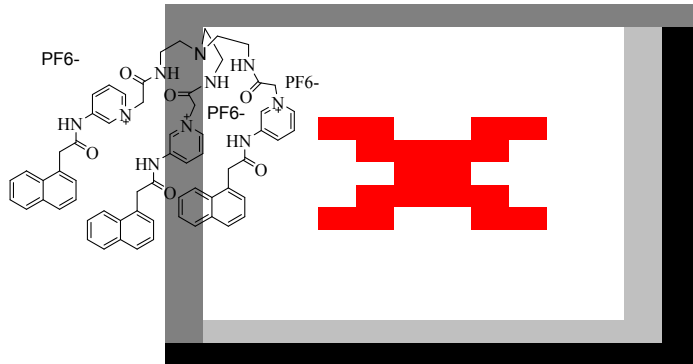

**$^{13}\text{C}$  NMR of 1 (100 MHz,  $\text{d}_6\text{-DMSO}$ ):**

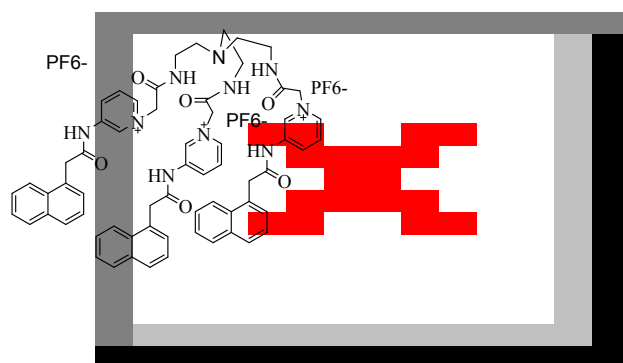

**HRMS OF 1:**

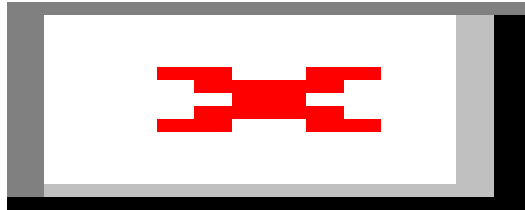

Supplement: c5ra04023j1.pdf [file c5ra04023j1.pdf]
